# Supplementary material
Source: publisher figshare collection journal article supplement (https://frontiersin.figshare.com/ndownloader/files/24719822)
Supplement: Supplementary file [file 24719822]

Dietary protocol

Time period:

Date of donation:

|       |           | Food | Beverages |
|-------|-----------|------|-----------|
|       |           |      |           |
| DAY 1 | Breakfast |      |           |
|       |           |      |           |
|       |           |      |           |
|       |           |      |           |
|       | Z1        |      |           |
|       |           |      |           |
|       |           |      |           |
|       |           |      |           |
|       | Lunch     |      |           |
|       |           |      |           |
|       |           |      |           |
|       |           |      |           |
|       | Z2        |      |           |
|       |           |      |           |
|       |           |      |           |
|       |           |      |           |
|       | Dinner    |      |           |
|       |           |      |           |
|       |           |      |           |
|       |           |      |           |
|       | Z3        |      |           |
| DAY 2 | Breakfast |      |           |
|       |           |      |           |
|       |           |      |           |
|       |           |      |           |
|       | Z1        |      |           |
|       |           |      |           |
|       |           |      |           |
|       |           |      |           |
|       | Lunch     |      |           |
|       |           |      |           |
|       |           |      |           |
|       |           |      |           |
|       | Z2        |      |           |
|       |           |      |           |
|       |           |      |           |
|       |           |      |           |
|       | Dinner    |      |           |
|       |           |      |           |
|       |           |      |           |
|       |           |      |           |
|       | Z3        |      |           |

[illegible]

z1, z2, z3 = snack
